# Supplementary material for: NMR and Mutational Identification of the Collagen-Binding Site of the Chaperone Hsp47
Source: PubMed Central journal article supplement (PMC3457968; doi:10.1371/journal.pone.0045930), 2012-09-25

# Figure S4

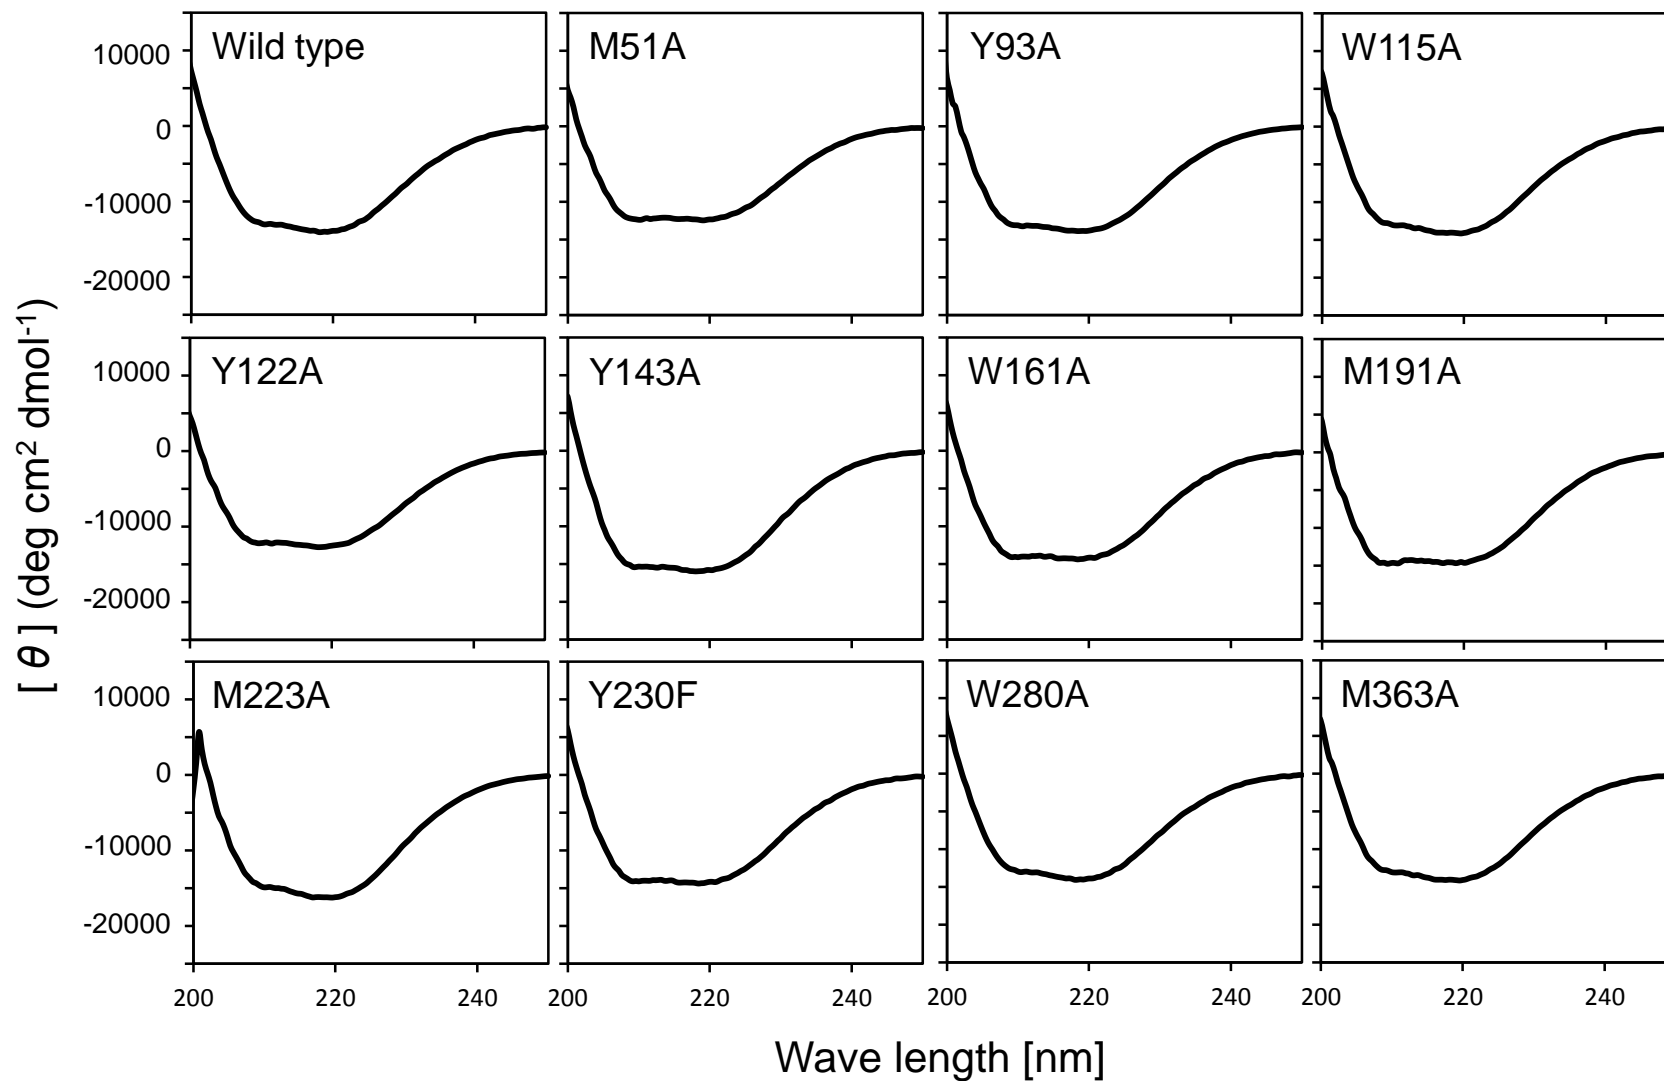

Supplement: pone.0045930.s004.pdf [file pone.0045930.s004.pdf]
