# Supplementary material for: NMR and Mutational Identification of the Collagen-Binding Site of the Chaperone Hsp47
Source: PubMed Central journal article supplement (PMC3457968; doi:10.1371/journal.pone.0045930), 2012-09-25
Supplement: pone.0045930.s006.pdf [file pone.0045930.s006.pdf]

**Table S1**

| Residue | Trimeric collagen peptide |                |                        |                |
|---------|---------------------------|----------------|------------------------|----------------|
|         | (-)                       |                | (+)                    |                |
| Trp     | $\epsilon$ -N<br>(ppm)    | $\epsilon$ -NH | $\epsilon$ -N<br>(ppm) | $\epsilon$ -NH |
| 115     | 123.3                     | 8.6            | 123.4                  | 8.6            |
| 163     | 131.1                     | 9.9            | 131.1                  | 9.9            |
| 197     | 129.0                     | 10.5           | 129.1                  | 10.5           |
| 280     | 131.2                     | 11.6           | 131.1                  | 11.4           |
| 346     | 121.2                     | 8.2            | 121.2                  | 8.2            |
| His     | $\alpha$ -N<br>(ppm)      | $\alpha$ -NH   | $\alpha$ -N<br>(ppm)   | $\alpha$ -NH   |
| 43      | 114.6                     | 8.3            | 114.7                  | 8.3            |
| 95      | 116.0                     | 7.8            | 116.1                  | 7.8            |
| 140     | n.d. <sup>b</sup>         | n.d.           | n.d.                   | n.d.           |
| 145     | 121.2                     | 7.7            | 121.0                  | 7.7            |
| 196     | n.d.                      | n.d.           | n.d.                   | n.d.           |
| 202     | 122.9                     | 9.6            | n.d.                   | n.d.           |
| 203     | n.d.                      | n.d.           | n.d.                   | n.d.           |
| 225     | 118.9                     | 7.6            | n.d.                   | n.d.           |
| 249     | n.d.                      | n.d.           | n.d.                   | n.d.           |
| 261     | 116.9                     | 8.1            | 116.7                  | 8.2            |
| 302     | n.d.                      | n.d.           | n.d.                   | n.d.           |
| 307     | 118.6                     | 6.7            | 118.5                  | 6.7            |
| 340     | 125.4                     | 8.7            | 125.4                  | 8.7            |
| 373     | 114.1                     | 7.1            | 114.4                  | 7.1            |

<sup>b</sup>not detectable.
