# Supplementary material for: NMR and Mutational Identification of the Collagen-Binding Site of the Chaperone Hsp47
Source: PLOS journal article supplement (doi:10.1371/journal.pone.0045930), 2012-09-25

**Figure S5**

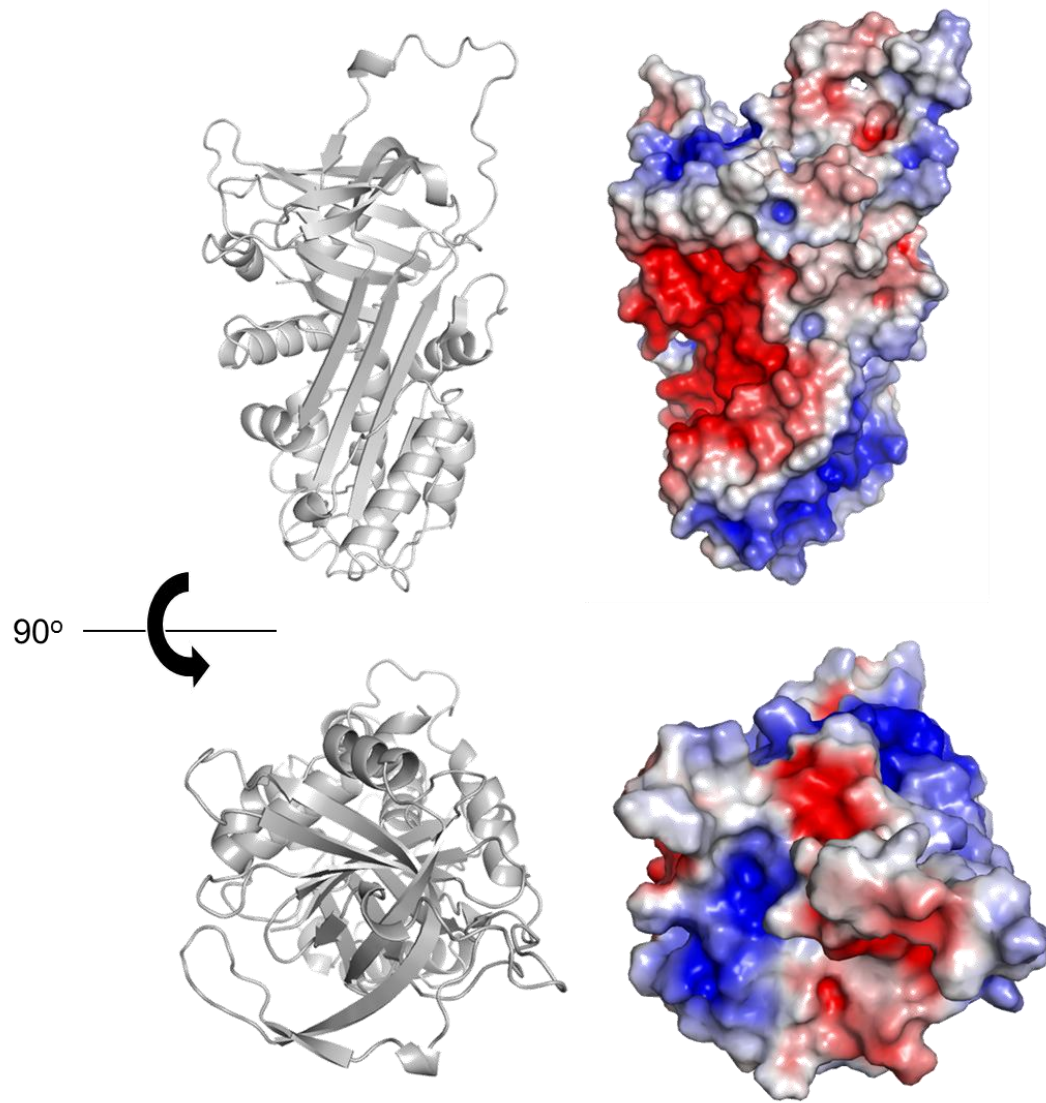

Supplement: S5 (10.1371/journal.pone.0045930.s005) [file journal.pone.0045930.s005]
